# Supplementary material for: Microfluidic analysis of salt-stress-mediated antibiotic tolerance in Mycobacterium smegmatis
Source: Royal Society of Chemistry journal article supplement (doi:10.1039/d5lc00713e), 2025-01-01
Supplement: d5lc00713e1.xlsx [file d5lc00713e1.xlsx]

## Sheet: Sheet1
Gene ID	Product	250 mM NaCl	1x STR	8x STR+250 mM NaCl
MSMEG_2821	IS1634-like element IS1549 family transposase	2.861	2.723	3.342
MSMEG_2712	HypC/HybG/HupF family hydrogenase formation chaperone	2.504	2.595	2.444
MSMEG_4009	2Fe-2S iron-sulfur cluster binding domain-containing protein	1.405	2.359	2.319
MSMEG_4197	DUF5703 family protein	1.843	2.656	2.305
MSMEG_5744	gas vesicle protein K	1.829	2.243	2.219
MSMEG_RS13580	hypothetical protein	1.755	1.96	2.187
MSMEG_2953	EthD family reductase	1.945	2.488	2.177
MSMEG_2668	hypothetical protein	1.321	1.575	1.849
MSMEG_4884	hypothetical protein	1.077		1.797
MSMEG_5745	gas vesicle protein	2.097		1.722
MSMEG_4726	maleylpyruvate isomerase N-terminal domain-containing protein			1.695
MSMEG_1729	IS630-like element ISMsm5 family transposase			1.694
MSMEG_RS15825	hypothetical protein	1.468	1.627	1.652
MSMEG_5016	heavy-metal-associated domain-containing protein		2.035	1.555
MSMEG_2675	IS30-like element ISMsm8 family transposase		1.153	1.491
MSMEG_1175	Rv2640c family ArsR-like transcriptional regulator	1.09	1.178	1.489
MSMEG_1434	nuclear transport factor 2 family protein	1.219	1.401	1.484
MSMEG_5069	Sec-independent protein translocase protein TatB	1.493	1.726	1.469
MSMEG_RS16305	hypothetical protein	1.199		1.278
MSMEG_4825	TetR/AcrR family transcriptional regulator			1.224
MSMEG_5677	maleylpyruvate isomerase N-terminal domain-containing protein			1.21
MSMEG_1701	purine-nucleoside phosphorylase			1.181
MSMEG_4193	histidine phosphatase family protein		1.058	1.178
MSMEG_0364	hypothetical protein	1.163	1.36	1.172
MSMEG_3510	IS630-like element ISMsm2 family transposase			1.169
MSMEG_5311	ABC transporter			1.169
MSMEG_RS10320	hypothetical protein			1.097
MSMEG_3129	TetR/AcrR family transcriptional regulator C-terminal ligand-binding domain-containing protein	1.106	1.32	1.089
MSMEG_3911	oxidoreductase	1.409	1.878	1.079
MSMEG_4352	DUF4185 domain-containing protein			1.066
MSMEG_3112	SDR family NAD(P)-dependent oxidoreductase		1.454	1.064
MSMEG_3204	nitroreductase family deazaflavin-dependent oxidoreductase	1.005	1.058	1.059
MSMEG_4782	hypothetical protein			1.04
MSMEG_3658	VOC family protein		1.43	1.039
MSMEG_RS11325	alpha-hydroxy-acid oxidizing protein		1.221	1.02
MSMEG_2453	GntR family transcriptional regulator			1.019
MSMEG_4163	SDR family oxidoreductase			1.016
MSMEG_6188	hypothetical protein			1.012
MSMEG_3170	RNA-binding S4 domain-containing protein			1.01
MSMEG_1922	type II 3-dehydroquinate dehydratase		1.196	1.006
MSMEG_1981	nitroreductase family deazaflavin-dependent oxidoreductase		1.064	1.002
MSMEG_4993	hypothetical protein			-1.012
MSMEG_5292	hypothetical protein			-1.042
MSMEG_1543	aldehyde dehydrogenase		-1.025	-1.08
MSMEG_2768	OB-fold nucleic acid binding domain-containing protein			-1.119
MSMEG_1238	DEAD/DEAH box helicase	-1.253		-1.133
MSMEG_5710	EspA/EspE family type VII secretion system effector	-1.21		-1.167
MSMEG_0965	MspA family porin		-1.431	-1.177
MSMEG_2756	hypothetical protein		1.07	-1.222
MSMEG_6427	superoxide dismutase	-1.027	-1.308	-1.306
MSMEG_6242	NDMA-dependent methanol dehydrogenase	-1.1	-1.486	-1.312
MSMEG_6241	MoxR family ATPase	-1.283	-1.364	-1.464
MSMEG_2313	class 1b ribonucleoside-diphosphate reductase subunit beta	-9.433	-9.24	-6.388
MSMEG_2303	OFA family MFS transporter	-4.384		-6.798
MSMEG_1016	NAD(P)H-dependent oxidoreductase	-5.781	-1.894	-7.35
MSMEG_2674	IS3 family transposase	2.678	3.001
MSMEG_3568	(2Fe-2S)-binding protein	1.695	2.348
MSMEG_4819	ferredoxin	1.556	2.345
MSMEG_RS05495	hypothetical protein	1.395
MSMEG_5388	metal-sensitive transcriptional regulator	1.353	1.708
MSMEG_RS33985	CoA transferase	1.352	1.616
MSMEG_3804	hypothetical protein	1.343	1.888
MSMEG_4946	plasmid pRiA4b ORF-3 family protein	1.337	1.96
MSMEG_2559	ferredoxin	1.326	2.912
MSMEG_3725	pyrroloquinoline quinone precursor peptide PqqA	1.295
MSMEG_4747	hypothetical protein	1.272
MSMEG_1307	EthD family reductase	1.263	1.708
MSMEG_5864	ferredoxin	1.219
MSMEG_4249	hypothetical protein	1.202
MSMEG_RS08815	hypothetical protein	1.194
MSMEG_6070	type B 50S ribosomal protein L31	1.192	1.66
MSMEG_1121	hypothetical protein	1.102	1.01
MSMEG_3835	hypothetical protein	1.092
MSMEG_3341	IS110 family transposase	1.09
MSMEG_RS33570	hypothetical protein	1.082
MSMEG_RS34150	hypothetical protein	1.079	1.733
MSMEG_0621	WXG100 family type VII secretion target	1.078	1.352
MSMEG_0977	DUF4229 domain-containing protein	1.075
MSMEG_1832	metallopeptidase family protein	1.06	1.068
MSMEG_1960	WXG100 family type VII secretion target	1.025
MSMEG_4973	VOC family protein	1.016	1.008
MSMEG_2186	urea amidolyase associated protein UAAP2	1.012
MSMEG_6759	glycerol kinase GlpK	-1.021	-1.302
MSMEG_6633	malonate decarboxylase acyl carrier protein	-1.076	-1.19
MSMEG_3329	DUF6131 family protein	-1.113
MSMEG_1919	transcriptional regulator WhiB1	-1.128	1.552
MSMEG_6463	plasmid pRiA4b ORF-3 family protein	-1.148	-1.086
MSMEG_0399	MbtH family protein	-1.159
MSMEG_0945	AURKAIP1/COX24 domain-containing protein	-1.225
MSMEG_RS13670	hypothetical protein	-1.301
MSMEG_1241	hypothetical protein	-1.429
MSMEG_3166	ISL3-like element IS1096 family transposase	-1.545	-2.545
MSMEG_2320	cytochrome c oxidase subunit I	-1.558	-5.442
MSMEG_2826	PIN domain-containing protein	-1.582
MSMEG_1860	hypothetical protein	-1.803
MSMEG_RS06945	mycofactocin precursor MftA	-1.964
MSMEG_4791	plasmid pRiA4b ORF-3 family protein	-2.109
MSMEG_2002	plasmid pRiA4b ORF-3 family protein	-2.236
MSMEG_1023	OFA family MFS transporter	-3.996	-8.73
MSMEG_0074	IS1634-like element IS1549 family transposase	-5.204	-4.114
MSMEG_2291	SDR family oxidoreductase	-5.437	-7.691
MSMEG_1036	LLM class flavin-dependent oxidoreductase	-5.612	-4.421
MSMEG_1021	VOC family protein	-5.737	-7.987
MSMEG_1028	NAD(P)/FAD-dependent oxidoreductase	-6.094	-5.264
MSMEG_2308	NAD(P)/FAD-dependent oxidoreductase	-6.286	-8.542
MSMEG_2288	hypothetical protein	-6.373	-6.183
MSMEG_2293	AAA family ATPase	-6.605	-8.861
MSMEG_1013	AAA family ATPase	-6.625	-8.879
MSMEG_2310	NAD(P)/FAD-dependent oxidoreductase	-6.65	-8.767
MSMEG_1033	class 1b ribonucleoside-diphosphate reductase subunit beta	-6.753	-8.999
MSMEG_2323	PLP-dependent aminotransferase family protein	-6.77	-5.202
MSMEG_1043	PLP-dependent aminotransferase family protein	-6.906	-6.055
MSMEG_2823	IS1634-like element IS1549 family transposase	-8.457	-6.445
MSMEG_2333	PQQ-binding-like beta-propeller repeat protein	-8.551	-8.358
MSMEG_6156	plasmid pRiA4b ORF-3 family protein	-8.581	-8.388
MSMEG_1009	cytochrome P450	-8.617	-8.424
MSMEG_1008	hypothetical protein	-8.859	-8.666
MSMEG_1053	PQQ-binding-like beta-propeller repeat protein	-8.903	-8.71
MSMEG_1030	NAD(P)/FAD-dependent oxidoreductase		-8.459
MSMEG_2282	plasmid pRiA4b ORF-3 family protein		-8.234
MSMEG_0073	IS1634-like element IS1549 family transposase		-6.314
MSMEG_4927	plasmid pRiA4b ORF-3 family protein		-5.301
MSMEG_6698	plasmid pRiA4b ORF-3 family protein		-5.189
MSMEG_3443	hypothetical protein		-2.55
MSMEG_5094	ISL3-like element IS1096 family transposase		-2.158
MSMEG_0066	WXG100 family type VII secretion target		-1.976
MSMEG_4368	hypothetical protein		-1.975
MSMEG_6697	ISL3-like element IS1096 family transposase		-1.927
MSMEG_6743	VOC family protein		-1.896
MSMEG_1104	hypothetical protein		-1.831
MSMEG_RS05500	hypothetical protein		-1.593
MSMEG_3760	helix-turn-helix domain-containing protein		-1.584
MSMEG_2805	IS630-like element ISMsm5 family transposase		-1.494
MSMEG_2903	IS110 family transposase		-1.456
MSMEG_6796	nuclear transport factor 2 family protein		-1.427
MSMEG_4453	phage holin family protein		-1.426
MSMEG_0272	BMC domain-containing protein		-1.414
MSMEG_6442	hypothetical protein		-1.388
MSMEG_4395	excalibur calcium-binding domain-containing protein		-1.317
MSMEG_0620	type VII secretion system protein EsxG		-1.303
MSMEG_2904	LLM class flavin-dependent oxidoreductase		-1.289
MSMEG_RS34105	SDR family oxidoreductase		-1.28
MSMEG_5165	DUF485 domain-containing protein		-1.213
MSMEG_0084	HPr family phosphocarrier protein		-1.206
MSMEG_0187	GNAT family N-acetyltransferase		-1.191
MSMEG_0203	plasmid pRiA4b ORF-3 family protein		-1.191
MSMEG_1310	IS1380-like element ISMsm11 family transposase		-1.183
MSMEG_1865	IS1634-like element IS1549 family transposase		-1.177
MSMEG_0344	ABC transporter permease		-1.17
MSMEG_4751	hypothetical protein		-1.164
MSMEG_6207	SRPBCC family protein		-1.151
MSMEG_1857	DDE-type integrase/transposase/recombinase		-1.148
MSMEG_6760	SRPBCC domain-containing protein		-1.148
MSMEG_6086	mycobilin-forming heme oxygenase MhuD		-1.144
MSMEG_4841	hypothetical protein		-1.141
MSMEG_0583	hypothetical protein		-1.129
MSMEG_1727	IS630 family transposase		-1.124
MSMEG_1864	integrase core domain-containing protein		-1.114
MSMEG_RS33750	hypothetical protein		-1.093
MSMEG_6444	YiaA/YiaB family inner membrane protein		-1.09
MSMEG_0820	DUF3303 family protein		-1.089
MSMEG_0303	NAD(P)-dependent alcohol dehydrogenase		-1.083
MSMEG_RS32225	hypothetical protein		-1.083
MSMEG_1105	LLM class flavin-dependent oxidoreductase		-1.08
MSMEG_1778	hypothetical protein		-1.079
MSMEG_3074	PH domain-containing protein		-1.073
MSMEG_RS13725	hypothetical protein		-1.071
MSMEG_6609	hypothetical protein		-1.065
MSMEG_0324	nuclear transport factor 2 family protein		-1.06
MSMEG_0420	hypothetical protein		-1.056
MSMEG_0951	glutaredoxin family protein		-1.056
MSMEG_6530	cytochrome c oxidase subunit 3 family protein		-1.054
MSMEG_5916	hypothetical protein		-1.045
MSMEG_6352	DUF4334 domain-containing protein		-1.043
MSMEG_1445	30S ribosomal protein S17		-1.041
MSMEG_1772	CDGSH iron-sulfur domain-containing protein		-1.039
MSMEG_0824	alpha/beta family hydrolase		-1.036
MSMEG_5156	HhH-GPD-type base excision DNA repair protein		-1.031
MSMEG_0802	ISL3-like element IS1096 family transposase		-1.026
MSMEG_2849	helix-turn-helix domain-containing protein		-1.026
MSMEG_4802	ferredoxin		-1.025
MSMEG_0486	ABC transporter substrate-binding protein		-1.012
MSMEG_6890	antibiotic biosynthesis monooxygenase		-1.007
MSMEG_2672	AMP-binding protein		1.005
MSMEG_RS33890	DUF448 domain-containing protein		1.007
MSMEG_2598	3-oxoacyl-ACP reductase		1.012
MSMEG_2596	gamma-glutamyl-gamma-aminobutyrate hydrolase family protein		1.013
MSMEG_3560	VOC family protein		1.014
MSMEG_3670	multidrug efflux SMR transporter		1.026
MSMEG_1717	IS30-like element ISMsm8 family transposase		1.028
MSMEG_3121	metalloregulator ArsR/SmtB family transcription factor		1.03
MSMEG_RS14085	hypothetical protein		1.041
MSMEG_2861	hypothetical protein		1.055
MSMEG_2885	SDR family NAD(P)-dependent oxidoreductase		1.055
MSMEG_5227	exodeoxyribonuclease VII small subunit		1.056
MSMEG_1758	hypothetical protein		1.057
MSMEG_1877	ComF family protein		1.075
MSMEG_2589	DUF2000 domain-containing protein		1.075
MSMEG_RS16235	DUF2510 domain-containing protein		1.077
MSMEG_4199	YbhB/YbcL family Raf kinase inhibitor-like protein		1.079
MSMEG_3531	hypothetical protein		1.087
MSMEG_1556	50S ribosomal protein L13		1.088
MSMEG_4299	enoyl-CoA hydratase-related protein		1.096
MSMEG_2435	30S ribosomal protein S16		1.1
MSMEG_2750	metal-dependent transcriptional regulator		1.111
MSMEG_1912	muconolactone Delta-isomerase		1.118
MSMEG_3944	response regulator transcription factor		1.147
MSMEG_2400	50S ribosomal protein L28		1.149
MSMEG_4181	phosphoribosyl-ATP diphosphatase		1.151
MSMEG_1436	50S ribosomal protein L3		1.152
MSMEG_3051	guanylate kinase		1.182
MSMEG_2654	30S ribosomal protein S15		1.192
MSMEG_4571	30S ribosomal protein S20		1.199
MSMEG_2606	metalloregulator ArsR/SmtB family transcription factor		1.201
MSMEG_3858	RNA polymerase-binding protein RbpA		1.203
MSMEG_5891	IS630-like element ISMsm5 family transposase		1.204
MSMEG_3545	hypothetical protein		1.215
MSMEG_1466	50S ribosomal protein L24		1.227
MSMEG_0054	IS630-like element ISMsm2 family transposase		1.264
MSMEG_3792	50S ribosomal protein L35		1.28
MSMEG_4151	ferredoxin		1.306
MSMEG_4333	TetR/AcrR family transcriptional regulator		1.317
MSMEG_1579	ribosomal protein S18-alanine N-acetyltransferase		1.349
MSMEG_3370	hypothetical protein		1.353
MSMEG_5669	IS630-like element ISMsm2 family transposase		1.358
MSMEG_6895	30S ribosomal protein S18		1.363
MSMEG_1066	DUF3349 domain-containing protein		1.366
MSMEG_2440	50S ribosomal protein L19		1.38
MSMEG_0904	hypothetical protein		1.385
MSMEG_1520	50S ribosomal protein L36		1.4
MSMEG_RS33785	TetR family transcriptional regulator		1.407
MSMEG_3542	hypothetical protein		1.432
MSMEG_4361	DUF1918 domain-containing protein		1.456
MSMEG_0918	helix-turn-helix transcriptional regulator		1.479
MSMEG_3782	Rid family hydrolase		1.5
MSMEG_1953	transcriptional regulator WhiB7		1.517
MSMEG_6162	plasmid pRiA4b ORF-3 family protein		1.528
MSMEG_RS33665	hypothetical protein		1.529
MSMEG_0202	ISL3-like element IS1096 family transposase		1.563
MSMEG_3195	hypothetical protein		1.646
MSMEG_1435	30S ribosomal protein S10		1.669
MSMEG_4407	hypothetical protein		1.685
MSMEG_4625	50S ribosomal protein L21		1.704
MSMEG_2608	PDGLE domain-containing protein		1.705
MSMEG_3165	plasmid pRiA4b ORF-3 family protein		1.714
MSMEG_1469	30S ribosomal protein S8		1.782
MSMEG_1224	NAD(+)--rifampin ADP-ribosyltransferase		1.793
MSMEG_1465	50S ribosomal protein L14		1.884
MSMEG_3330	CsbD family protein		2.019
MSMEG_2168	hypothetical protein		2.103
MSMEG_3482	hypothetical protein		2.114
MSMEG_5180	hypothetical protein		2.124
MSMEG_0197	NUDIX hydrolase N-terminal domain-containing protein
MSMEG_1093	urease subunit beta
MSMEG_1468	type Z 30S ribosomal protein S14
MSMEG_2582	peroxiredoxin-like family protein
MSMEG_3889	YafY family protein
MSMEG_4419	SDR family oxidoreductase
MSMEG_6625	VOC family protein
MSMEG_6631	malonate decarboxylase holo-ACP synthase
